# Supplementary material for: Prevention of Postoperative Events following Reversal with Sugammadex or Neostigmine (the P-PERSoN Trial): Pilot Data Following Early Termination of a Prospective, Blinded, Randomised Trial
Source: Anesthesiol Res Pract. 2022 Jul 8;2022:4659795. doi: 10.1155/2022/4659795 (PMC9286967; doi:10.1155/2022/4659795)
Supplement: Supplementary Materials — Protocol 2.1 – Full Protocol of trial. CONSORT 2010 Checklist P-PERSoN–Copy of CONSORT checklist. Supplementary Materials. [file 4659795.f1.zip]

Archive with 2 entries (2 files):
- CONSORT 2010 Checklist PPERSoN.doc
- Protocol2.1.pdf
